# Supplementary material
Source: publisher site journal article supplement (https://neotropical.pensoft.net/article/37655/download/suppl/31/)
Supplement: Supplementary file 1

Supplementary material

Supplementary Material 1. Minimum (Min Freq (Hz)) and maximum (Max Freq (Hz)) frequency, phrase duration (Time (s)), and number of notes emitted by *M. leucoblephara* duets in three forest remnants of Atlantic Forest, in southern Brazil. NF-1 and NF-2 = fragments of the National Forest of Chapecó; PA = private area. The numbers 1 and 2 serve to differentiate the vocalization of the two individuals who vocalize in a duet.

| **Location** | **Forest Area** | **Individual** | **Min Freq (Hz)** | **Max Freq (Hz)** | **Time (s)** | **# notes** |
| --- | --- | --- | --- | --- | --- | --- |
| PA | Interior | 1 | 2.851 | 9.980 | 6.961 | 27 |
|  | 2 | 5.037 | 9.694 | 3.074 | 27 |
| Edge | 1 | 2.756 | 9.409 | 7.375 | 32 |
|  | 2 | 2.566 | 9.504 | 8.325 | 32 |
| Interior | 1 | 2.851 | 8.554 | 4.876 | 21 |
|  | 2 | 2.946 | 8.459 | 4.982 | 21 |
| Interior | 1 | 2.946 | 9.409 | 5.814 | 27 |
|  | 2 | 2.851 | 10.075 | 5.484 | 27 |
| Interior | 1 | 2.566 | 9.504 | 4.236 | 28 |
|  | 2 | 2.566 | 8.554 | 4.381 | 28 |
| NF-1 | Interior | 1 | 3.802 | 9.409 | 5.685 | 29 |
|  | 2 | 3.802 | 9.980 | 5.883 | 29 |
| Interior | 1 | 3.041 | 9.124 | 6.609 | 24 |
|  | 2 | 3.517 | 9.219 | 5.675 | 24 |
| Interior | 1 | 4.087 | 7.508 | 3.434 | 13 |
|  | 2 | 4.087 | 7.318 | 3.996 | 13 |
| Edge | 1 | 3.897 | 8.459 | 3.390 | 16 |
|  | 2 | 3.802 | 8.364 | 3.846 | 16 |
| Interior | 1 | 3.136 | 8.174 | 5.512 | 25 |
|  | 2 | 3.136 | 8.364 | 5.732 | 25 |
| Interior | 1 | 3.707 | 7.603 | 3.182 | 17 |
|  | 2 | 3.612 | 7.698 | 3.774 | 17 |
| Edge | 1 | 3.041 | 8.554 | 6.047 | 28 |
|  | 2 | 3.136 | 9.124 | 7.140 | 28 |
| NF-2 | Edge | 1 | 3.562 | 10.014 | 6.759 | 21 |
|  | 2 | 3.495 | 9.879 | 6.721 | 21 |
| Edge | 1 | 3.992 | 7.794 | 3.940 | 18 |
|  | 2 | 4.277 | 7.413 | 3.685 | 18 |
| Interior | 1 | 3.612 | 9.599 | 6.198 | 29 |
|  | 2 | 3.231 | 9.694 | 6.209 | 29 |
| Interior | 1 | 3.360 | 7.997 | 6.722 | 26 |
|  | 2 | 4.637 | 7.863 | 4.710 | 26 |
| Edge | 1 | 2.851 | 8.554 | 4.284 | 17 |
|  | 2 | 2.756 | 8.459 | 3.625 | 17 |
